# Supplementary material for: Mechanism of regulation of ‘chromosome kissing’ induced by Fob1 and its physiological significance
Source: PubMed Central journal article supplement — Genes Dev. 2015 Jun 1;29(11):1188–201. doi: 10.1101/gad.260844.115 (PMC4470286; doi:10.1101/gad.260844.115), 2015-06-01

**Supplementary information:**  
**Mechanism of Regulation of “Chromosome- Kissing”**  
**Induced by Fob1 and its Physiological Significance**

Malay Choudhury<sup>1\*</sup>, Shamsu Zaman<sup>1\*</sup>, James C. Jiang<sup>2</sup>, S Michal Jazwinski<sup>2</sup>  
and Deepak Bastia<sup>1#</sup>

1, Department of Biochemistry and Molecular Biology  
Medical University of South Carolina  
Charleston, SC 29425.

2, Tulane Center for Aging and Department of Medicine  
Tulane University School of Medicine  
New Orleans, LA 70112

\*These authors contributed equally to the project

# Corresponding author; phone: 843-792-0491; email: [bastia@musc.edu](mailto:bastia@musc.edu)

## Supplementary methods

### ***4C analysis***

Method or protocols were mainly followed from published articles by (Splinter et al. 2004), (Miele and Dekker, 2009) (Singh et al. 2010) with some modifications.

Four strains of *Saccharomyces cerevisiae* were used, i.e., LPY11, LPY11fob $\Delta$ , LPY11fobE373V, and LPY11rad52 $\Delta$ . All these strains were transformed with pBBHyg Ter plasmid (see main text).

Transformed yeast cells were grown in YPD containing Hygromycin (200  $\mu$ g/ml). Overnight cultures of 50 ml yeast cells were grown at 30<sup>0</sup>C. The next day cells were diluted to an OD<sub>600</sub> = 0.2 in 500 ml. Cultures were incubated at 30<sup>0</sup>C till OD reached 0.7. Formaldehyde was added (1% final volume) for 10 min. with constant stirring, quenched with 125 mM glycine for 15 min at room temperature. Cells were harvested by centrifugation at 1500xg for 5 min. Control cells without HCOH treatment were also harvested and processed in parallel. Cells were resuspended in 50 ml of spheroplast buffer (0.4M sorbital, 0.4M KCl, 40mM Potassium Phosphate buffer, pH7.2 and 0.5mM MgCl<sub>2</sub>) with 30 mM DTT and were centrifuged at 1500xg for 10 min. Pellet was resuspended in 50 ml of spheroplast buffer with 1 mM DTT. Fixed cells were converted to spheroplast with 250  $\mu$ l of 10 mg/ml Zymolyase for 1 hr at 30<sup>0</sup>C with very gentle rotation. In between cells were checked under the microscope for spheroplast formation.

Spheroplasts were collected by centrifugation at 4<sup>0</sup>C for 5 min at 1500xg. Pellet was washed twice with 50 ml of spheroplast buffer. Pellet was resuspended and washed in 50 ml restriction enzyme (RE) buffer. Final pellet was resuspended in 8 ml RE buffer (50mM Tris.HCl pH 7.9, 100 mM MgCl<sub>2</sub>, 1mM DTT and 100 µg/ml BSA) + 80 µl of 10% SDS , 440 µl of 20% Triton X-100 were added and divided into 17 tubes. Tubes were incubated at 65<sup>0</sup>C for 20 min followed by 37<sup>0</sup>C for 1 hr with shaking.

Lysates were digested with Eco RI and Afl III enzymes (30 units/ chromatin samples) overnight at 37<sup>0</sup>C with constant mixing. Next day morning more (10 Units each tube) enzymes were added for continuing digestion. DNA was sheared by sonication using a number of short pulses (10 sec) with pauses (30 sec) while controlling the temperature by keeping the suspension over ice. DNA was fragmented to <1000 bp. This step was checked by gel electrophoresis in control DNA/pilot study.

Enzymes were inactivated by adding 90µl of 10% SDS, 1% Triton X-100 and incubated at 80<sup>0</sup>C for 10 min, 65<sup>0</sup>C for 20 min followed by 1 hr at 37<sup>0</sup>C. Digested and sheared DNA was pooled and diluted into ligation buffer (10x, 500 mM Tris.HCl, pH 7.5, 100 mM MgCl<sub>2</sub>, 100 mM DTT, 10xBSA (10 mg/ml) and 100 mM ATP), incubated for 1 hr at 37<sup>0</sup>C. T4 ligase (200 units/Tube) was added and ligation was carried out at 4<sup>0</sup>C for 4 days with continuous slow rotation. Every 12 hrs fresh ATP was added to the ligation mix at 2 mM concentration. After completion of ligation for reversal of cross linking, proteinase K (0.5%, 20mg/ml) was added and the sample was incubated overnight at 65<sup>0</sup>C. Next day, additional

proteinase K (0.5%, 20mg/ml) was added and incubation was continued for 2 hrs at 55<sup>0</sup>C. The suspension was cooled down to room temperature, 3M Na-acetate, pH 5.2 and isopropanol were added and it was kept at -80<sup>0</sup>C for 2 hrs to precipitate DNA. Samples were centrifuged at 5000xg. DNA pellet was dissolved in 500 µl of TE and after addition of 10 µl RNase A (10 mg/ml) sample was incubated at 37<sup>0</sup>C overnight. DNA was extracted 3-times with phenol/chloroform. DNA was precipitated with isopropanol and washed 3-times with 70% ethanol. The DNA pellet was dissolved in 50 µl of TE. To detect ligated product, PCR was conducted with two pairs of primer, i.e. F1- F3 and F2- F4. PCR conditions were 95<sup>0</sup>C -5 min, (95<sup>0</sup>C /10sec, 54<sup>0</sup>C /10sec, 72<sup>0</sup>C /10sec) 20 cycles.

### ***Construction of strains for RLS determination***

The BamHI/Sall fragments from plasmid pGAD424-F373, pGAD424-F373ΔC, pGAD424-FT504A-S519A and pGAD424-FT504D-S519D were subcloned into the BamHI/Sall site of the yeast integrative plasmid pRS406, which contains a URA3 selectable marker (Sikorski and Hieter, 1989). Newly-constructed plasmids containing the relevant point mutations in Fob1 were linearized with the restriction enzyme AflIII, which cuts only once in the middle of the FOB1 coding region. This linearized plasmid was used to transform yeast strain YPK9 (Kirchman et al. 1999). Transformants were selected on uracil- plates. Then, the transformants were grown in YPD liquid medium overnight to allow the pRS406-URA3 sequence to pop out. 100 µl of culture were streaked on 5'FOA plates to select clones lacking the URA3

gene, and mutants were verified by DNA sequencing (Scherer and Davis, 1979). This included the *FOB1* coding region plus 220 bp upstream and downstream. For mutants containing  $\Delta C$ , a knock-out/knock-in method was employed. The *FOB1* gene was knocked out with replacement by the *URA3* gene. The resulting strain was transformed with a PCR fragment consisting of 50 bp of *FOB1* 5'-flanking region—the *fob1* mutant---50 bp of *FOB1* 3'-flanking region. Knock-in mutants were selected on 5'FOA plates and their sequence was verified, as described above. The strains containing the T504A-S519A and T504D-S519D substitutions in Fob1 were generated using the same knock-out/knock-in strategy as above. Strains were verified by DNA sequencing, as above.

### Supplementary references

- Kirchman PA, Kim S, Lai CY, Jazwinski SM. 1999. Interorganelle signaling is a determinant of longevity in *Saccharomyces cerevisiae*. *Genetics* **152**: 179-190.
- Miele A, Dekker J. 2009. Mapping cis- and trans- chromatin interaction networks using chromosome conformation capture (3C). *Methods Mol Biol* **464**: 105-121.
- Scherer S, Davis RW. 1979. Replacement of chromosome segments with altered DNA sequences constructed in vitro. *Proc. Natl. Acad. Sci. U.S.A.* **76**: 4951-4955.
- Sikorski RS, Hieter P. 1989. A system of shuttle vectors and yeast host strains designed for efficient manipulation of DNA in *Saccharomyces cerevisiae*. *Genetics* **122**: 19-27.

Singh S, Sabatinos S, Forsburg SL, Bastia D. 2010. Regulation of replication termination by Reb1 protein-mediated action at a distance. *Cell* **142**: 868-878.

Splinter E, Grosveld F, De Laat W. 2004. 3C technology: analyzing the spatial organization of genomic loci in vivo. *Methods in Enzymology* **375**: 493-507.

**Table 1. Yeast Strains and plasmids**

| <b><i>S. cerevisiae</i> strains</b> | <b>Genotype</b>                                                                                              | <b>Source</b>           |
|-------------------------------------|--------------------------------------------------------------------------------------------------------------|-------------------------|
| W303                                | MATa ( <i>leu2-3,112 trp1-1 can1-100 ura3-1 ade2-1 his3-11,15</i> )                                          | R. Rothstein            |
| LPY11                               | W303a <i>sir2Δ:HIS3</i>                                                                                      | L. Pillus               |
| Lfob1                               | LPY11 <i>fob1Δ</i> :G418                                                                                     | Mohanty et al.,(2009)   |
| Lrad52                              | LPY11 <i>rad52Δ</i> :G418                                                                                    | Mohanty et al.,(2009)   |
| MC11                                | Lfob1 <i>fob1E373V</i> : Phleomycin                                                                          | This study              |
| MC12                                | Lfob1 <i>fob1E373VΔC</i> : Phleomycin                                                                        | This study              |
| MC13                                | Lfob1 <i>fob1S504A,S519A</i> : Phleomycin                                                                    | This study              |
| MC14                                | Lfob1 <i>fob1S504D,S519D</i> : Phleomycin                                                                    | This study              |
| PJ69-4A                             | MATa <i>trp1-Δ901 leu2-3,112 901 ura3-52 his3-Δ200 gal4Δ gal8Δ GAL2-ADE2 LYS2::GAL1-HIS3 met2::GAL7-lacZ</i> | (James et al., 1996)    |
| YPK9                                | MATa <i>ade2-101<sup>ochre</sup> his3-Δ200 leu2-Δ1 lys2-801<sup>amber</sup> trp1-Δ63 ura3-52</i>             | (Kirchman et al., 1999) |
| <b>Plasmid</b>                      |                                                                                                              |                         |
| pGAD424                             |                                                                                                              | Clontech                |
| pGBT9                               |                                                                                                              | Clontech                |
| pGAD424Fob1                         |                                                                                                              | This study              |
| pGAD424fob1M213L                    |                                                                                                              | This study              |
| pGAD424fob1E373V                    |                                                                                                              | This study              |
| pGAD424fob1S504A,519A               |                                                                                                              | This study              |
| pGAD424fob1S504D,519D               |                                                                                                              | This study              |
| pGBT9fob1E373V                      |                                                                                                              | This study              |
| pGAD424fob1T322I                    |                                                                                                              | This study              |
| pGBT9Fob1                           |                                                                                                              | This study              |
| pGBT9fob1S504A,S519A                |                                                                                                              | This study              |
| pGBT9fob1S504D,S519D                |                                                                                                              | This study              |
| pGAD424NFob1(1-1287)                |                                                                                                              | This study              |
| pGBT9CFob1(1288-1701)               |                                                                                                              | This study              |

---

|                       |            |
|-----------------------|------------|
| pGBT9Cfob1T452S,P530A | This study |
| pGBT9Cfob1Q550E,G561S | This study |
| pGBT9Cfob1K454T       | This study |
| pMALCFob1             | This study |
| pMALCF0b1 K454T       | This study |

---



**Table 2. Oligonucleotides**A. Primers for Site Directed Mutagenesis of *fob1*

**M213L-F** 5'GGAATATAAACGTCCTGACTTGTACGATAAACTAC3'  
**M213L-R** 5'GTAGTTTATCGTACAAGTCAGGACGTTTATATTCC3'  
**E373V-F** 5'TGCAAGTACTACTTAGTGTAGTTCCAGGTCACAATG3'  
**E373V-R** 5'GCATTGTGACCTGGAACACTACTAAGTAGTACTTGC3'  
**K454T-F** 5'ATCTAACTGAAACAACTATATCGATGAGTATG3'  
**K454T-R** 5'ATACTCATCGATATAGTTTGTTCAGTTAGATCAAATTG3'  
**T504A-F** 5'CCAATGCAGGGAGCAGAAGAGCCTGAAAAAG3'  
**T504A-R** 5'TTTTTGAGGCTCTTCTGCTCCCTGCATTGGGGC3'  
**S519A-F** 5'AAAGTGACGGTGCAGCACAAGTAGATCAAAG3'  
**S519A-R** 5CTTTGATCTACTTGTGCTGCACCGTCAC3'  
**T504D-F** 5'AGCCCAATGCAGGGAGATGAAGAGCCTGAAAAAG3'  
**T504D-R** 5'CCTTTTTCAGGCTCTTCATCTCCCTGCATTGGGGCTG3'  
**S519D-F** 5'GAAAGTGACGGTGCAGACCAAGTAGATCAAAGTG3'  
**S519D-R** 5'CACTTTGATCTACTTGGTCTGCACCGTCACTTTC3'

B. Primers for *fob1* cloning in 2 hybrid vectors

**FOBAM-F** 5'GCGGCGGATCCGGATGACGAAACCGCGTTACAATGACG3'  
**FOBSAL-R** 5'GCGGTCGACCAATTCCATTGATGTGCCAAAGTCTCTTG3'  
**NFOBSAL** 5'GCGGTCGACTCCATTATTGTTACAGCTATTATCCGC3'  
**CFOBBAM** 5'GCGGGATCCGGATGATTCTTCATAATAACAATATAGG3'

C. Primers for *fob 1* cloning in expression vector

**FOBBAM-F** 5'CACACGGATCCACATATGACGAAACCGCGTTACAATGACGTGTTG3'  
**FOBBAM-R** 5'CACACGGATCCTACAATTCATTGATGTGCCAAAGTCTCTTG3'  
**FOBMBP-F** 5'GGCGGATCCATGACGAAACCGCGTTACAATG3'  
**CFOBMBP-F** 5'CGGGATCCATGATTCTTCATAATAACAATATAG3'

## D. Primers for rDNA probe preparation and used in 2D gel probe

**RDN1350** 5'CTGAACATGTCTGGACCCTGCCCTC3'

**RDN2800** 5'AGGCGTCCTTGTGGCGTCGCTGAAC3'

## E. Primers for fob1 Knock In/Knock out

**FOB1F44+22**

5'CAATTTAACGATTGTGTGAGTGTGAATTTGTGCTGAGGATAACAATGAC

GAAACCGCGTTACAATGACG3'

**FOBCRELOX-F** 5'GAGATCAAACAAGAGACTTTGGCACATCAATGGAATTGTAACAGCTGA

AGCTTCGTACGCTGCAG3'

**FOB1CRELOX-R** 5'GCGTACGAAGCTTCAGCTGTTACAATTCCATTGATGTGTGCCAAAGTCT

CTTGTTTGATCTC3'

**NFOBCRELOX-F** 5'GAAGCGGATAATAGCTGTAACAATAATGGATAACAGCTGAAGCTTCGT

ACGCTGCAG3'

**NFOB-CRELOX-R**

5'GCGTACGAAGCTTCAGCTGTTATCCATTATTGTTACAGCTATTATCCGCT TCATTAGC3'

**FOB+41TO1CRELOX-R**

5'CACCTATGGTGACTCCTCCTTTTCATTCTATCCTACATATTAGCATAGGCC

ACTAGTGGATCTGATAT3'

**F. Primers for 4C**

**F1** 5'GCACTGGCTATTCATCTTGCACTTTTCCTC3'

**F2** 5'GGAAAAGTGCAAGATGAATAGCCAGTG3'

**F3** 5'CGATGAGGATGATAGTGTGTAAAGAGTG3'

**F4** 5'GGTACACTCTTACACACTATCATCCTCATCG3'

**Table 3. Statistical analyses of RLS**

| <b>Experiment</b> | <b>strain</b>                          | <b>mRLS</b> | <b>maxRLS</b> | <b>p-values</b> |        |       |
|-------------------|----------------------------------------|-------------|---------------|-----------------|--------|-------|
| I                 | wt                                     | 19.8        | 36            | *               | *      |       |
|                   | <i>fob1</i> Δ                          | 29.8        | 52            | 0.0001          | *      |       |
|                   | <i>fob1</i> <sup>E373V</sup>           | 27.2        | 50            | 0.0001          | 0.29   |       |
| II                | wt                                     | 20.7        | 30            | *               | *      |       |
|                   | <i>fob1</i> <sup>E373V</sup>           | 27.7        | 39            | 0.001           | *      |       |
|                   | <i>fob1</i> <sup>E373VΔC</sup>         | 28.7        | 45            | 0.001           | 0.17   |       |
| III               | wt                                     | 18.7        | 29            | *               | *      | *     |
|                   | <i>fob1</i> Δ                          | 29.9        | 44            | 0.0001          | *      | *     |
|                   | <i>fob1</i> <sup>T504A,</sup><br>S519A | 22.6        | 35            | 0.008           | 0.001  | *     |
|                   | <i>fob1</i> <sup>T504D,</sup><br>S519D | 18.6        | 31            | 0.66            | 0.0001 | 0.002 |

## Supplementary Figure legends

**Fig.S1. Biochemical activities of N-Fob1 in comparison with full length Fob1.** **A**, 2D gels showing that N-Fob1 and Fob1 arrest replication forks to comparable extents whereas  $\Delta fob1$ , as expected fails to arrest forks at Ter sites; **B**, silencing of the mUra3 reporter occurs to similar extents in cells expressing Fob1 and NFob1. The results show that amino acid sequence of C-Fob1 is dispensable for the aforementioned biological activities of N-Fob1.

**Fig.S2. C-Fob1 inhibits the protein-protein interactions between Fob1 and RPA2.** **A**, Y2H analysis showing that whereas RPA2 interacts very poorly with full length Fob1, it interacts strongly with NFob1; **B, I**, phosphorimager-generated data showing the interactions of 0.1-0.3 pmoles of labeled WT C-Fob1 and m3-C-fob1 with 1 pmole each of matrix-bound N-Fob1, **ii**, quantification of binding data; **C**, the activities of the lacZ reporter present in the Y2H indicator cells confirm the results shown in A; **D**, Y2H analysis showing that the double A substituted fob1 protein binds poorly to RPA2 and the binding is partially restored by the double D substitutions.

**Fig.S3. C-Fob1K454T that interacts very poorly in *trans* with N-Fob1 (Fig.2), has the interaction ameliorated in *cis*.** **A**, Y2H analysis showing that fob1K454T interacts somewhat more than wtFob1 with than the latter with itself, fob1K454T similarly interacts slightly better with wt N-Fob1 in comparison with the interaction of N-Fob1 with itself; **B**, as confirmed by the activity of the  $\beta$  galactosidase reporter of the yeast 2 hybrid indicator strain.

**Fig.S4. Various measurements showing that a deletion of the inhibitory C-terminus overcomes the loss of Fob1 tetramerization in the E373V fob1 mutant, significantly overcomes integrative recombination between a plasmid-borne Ter and chromosomal Ter (Fig.4C) but fails to reduce the magnitude of life span extension by the E373V mutation;** **A**, Y2H data showing that whereas fob1 E373V fails to interact with itself (row IV) deletion of its C-terminal domain at least partly restores this interaction; **B**,  $\beta$ -galactosidase

assays confirming the data shown in A; C, integrative recombination assay showing that deletion of the C-terminus, partially restores that ability of *fob1E373VΔC* to integrate in the plasmid integration assay (Fig.4); D, RLS analyses showing that 4 separate isolates of *fob1E373VΔC* have the same life span as *fob1 E373V*.

Choudhuri et al. Fig.S1

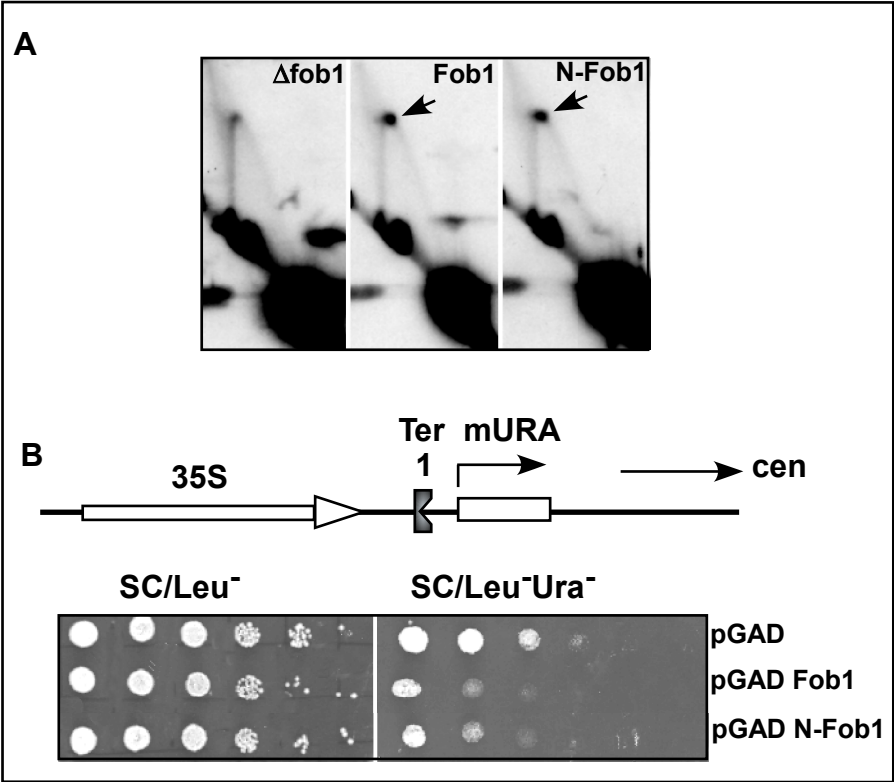

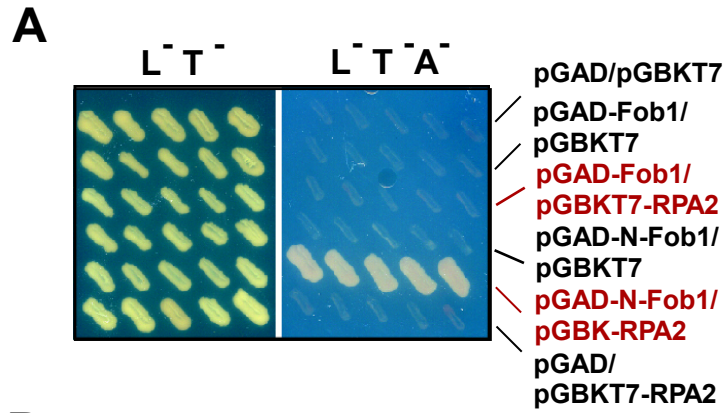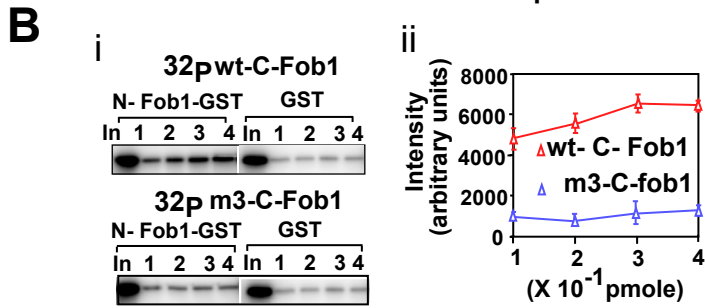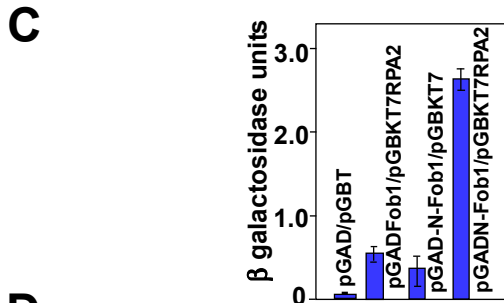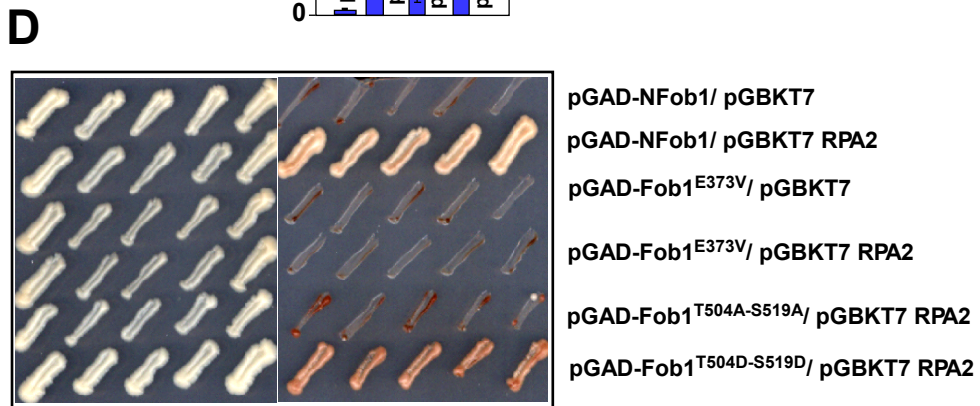

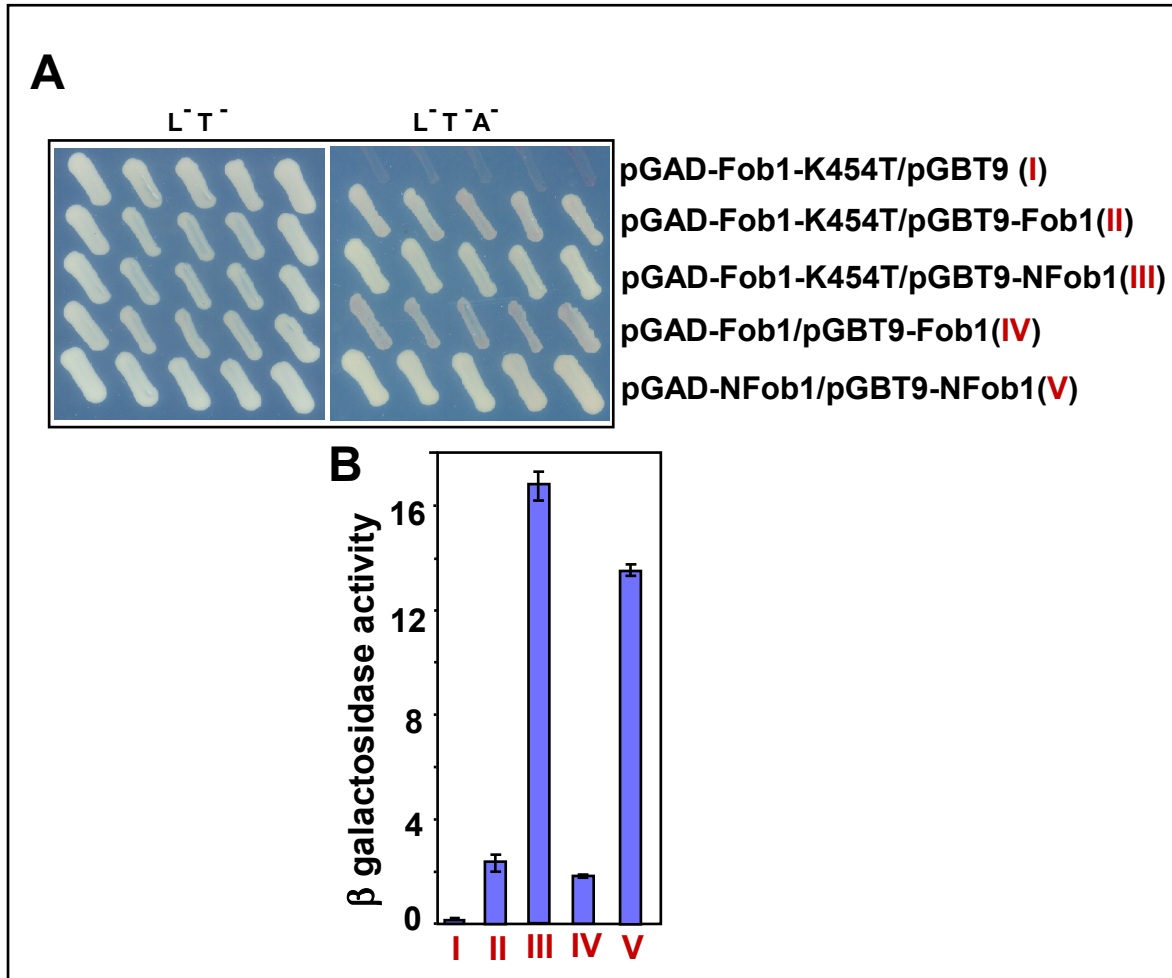



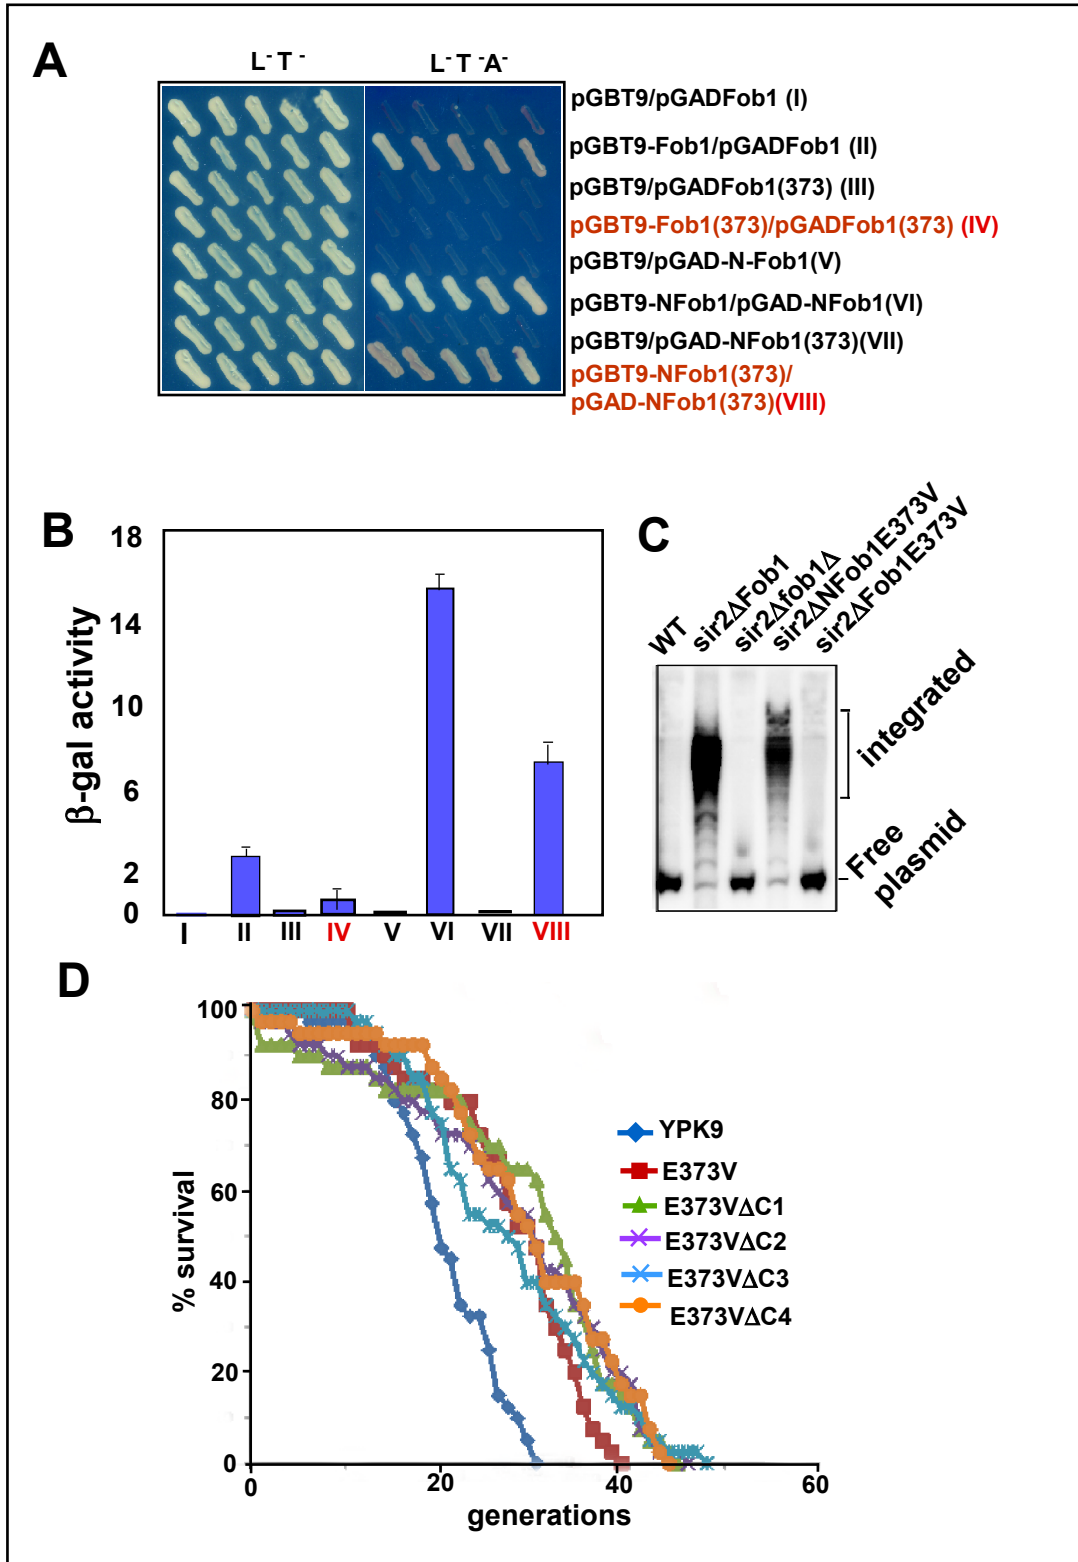

Supplement: supp_29.11.1188_Supplemental_Material.pdf [file supp_29.11.1188_Supplemental_Material.pdf]
