# Supplementary figures and images for: Mechanism of regulation of ‘chromosome kissing’ induced by Fob1 and its physiological significance
Source: PubMed Central journal article supplement — Genes Dev. 2015 Jun 1;29(11):1188–201. doi: 10.1101/gad.260844.115 (PMC4470286; doi:10.1101/gad.260844.115), 2015-06-01

Choudhury et al. Fig.S1

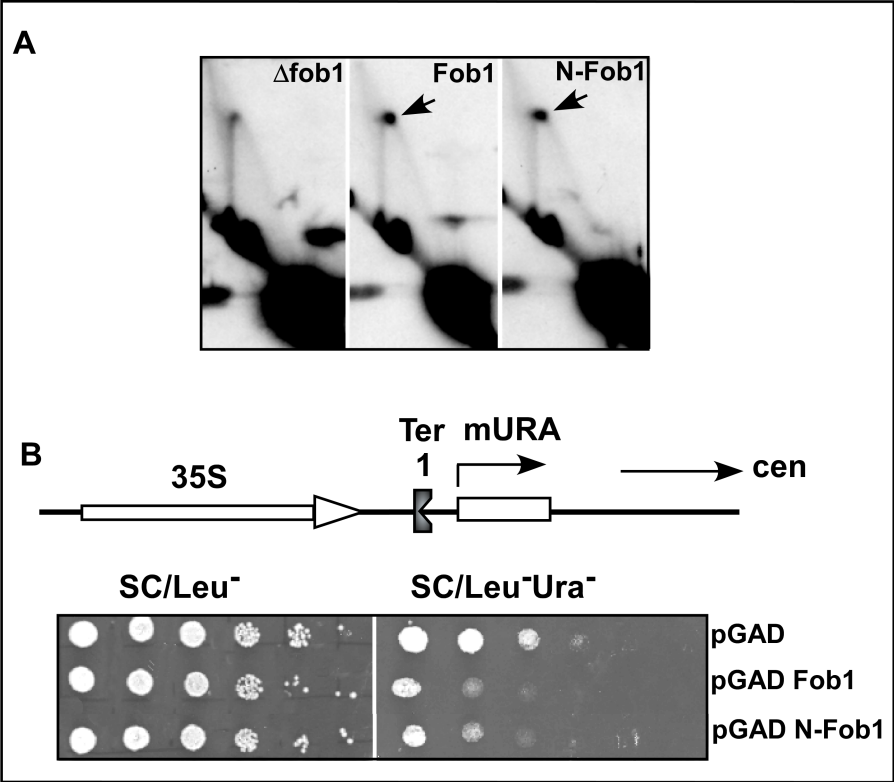

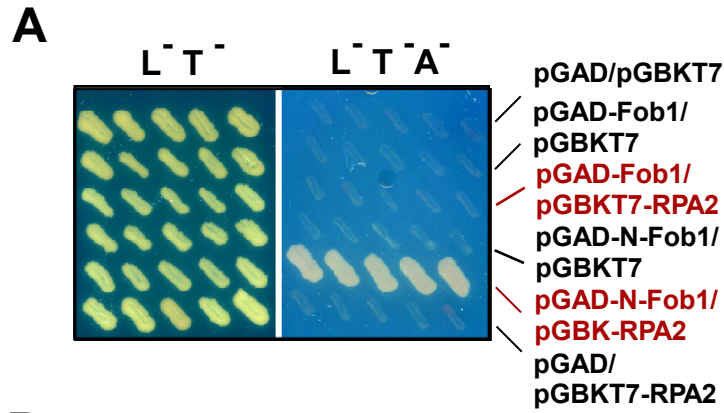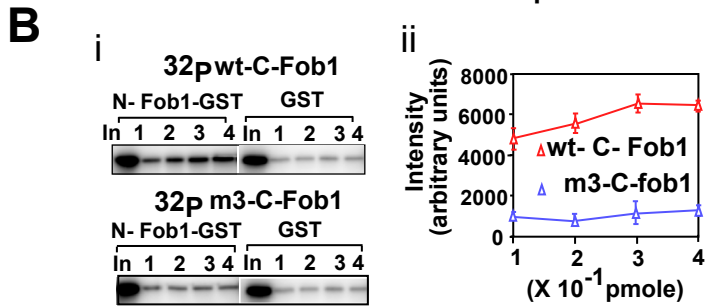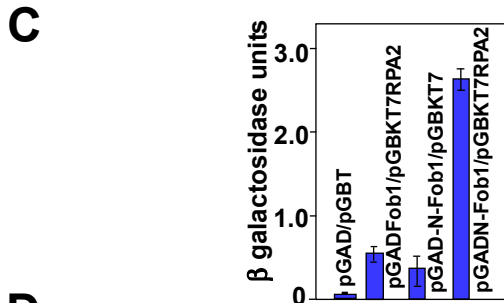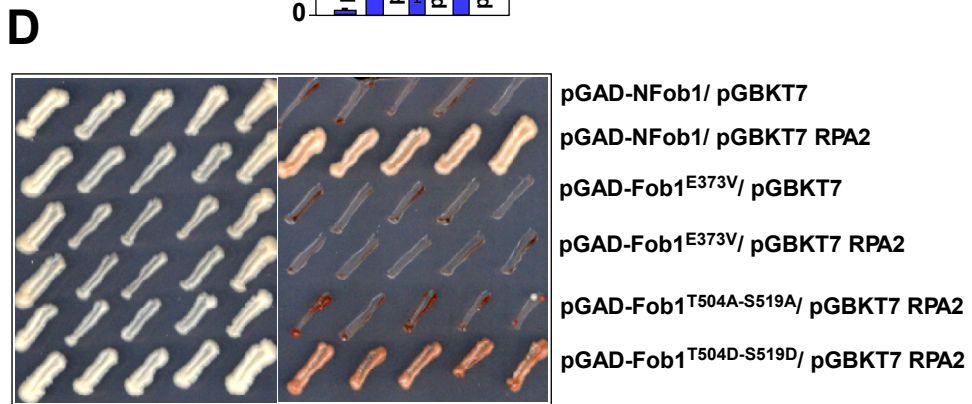



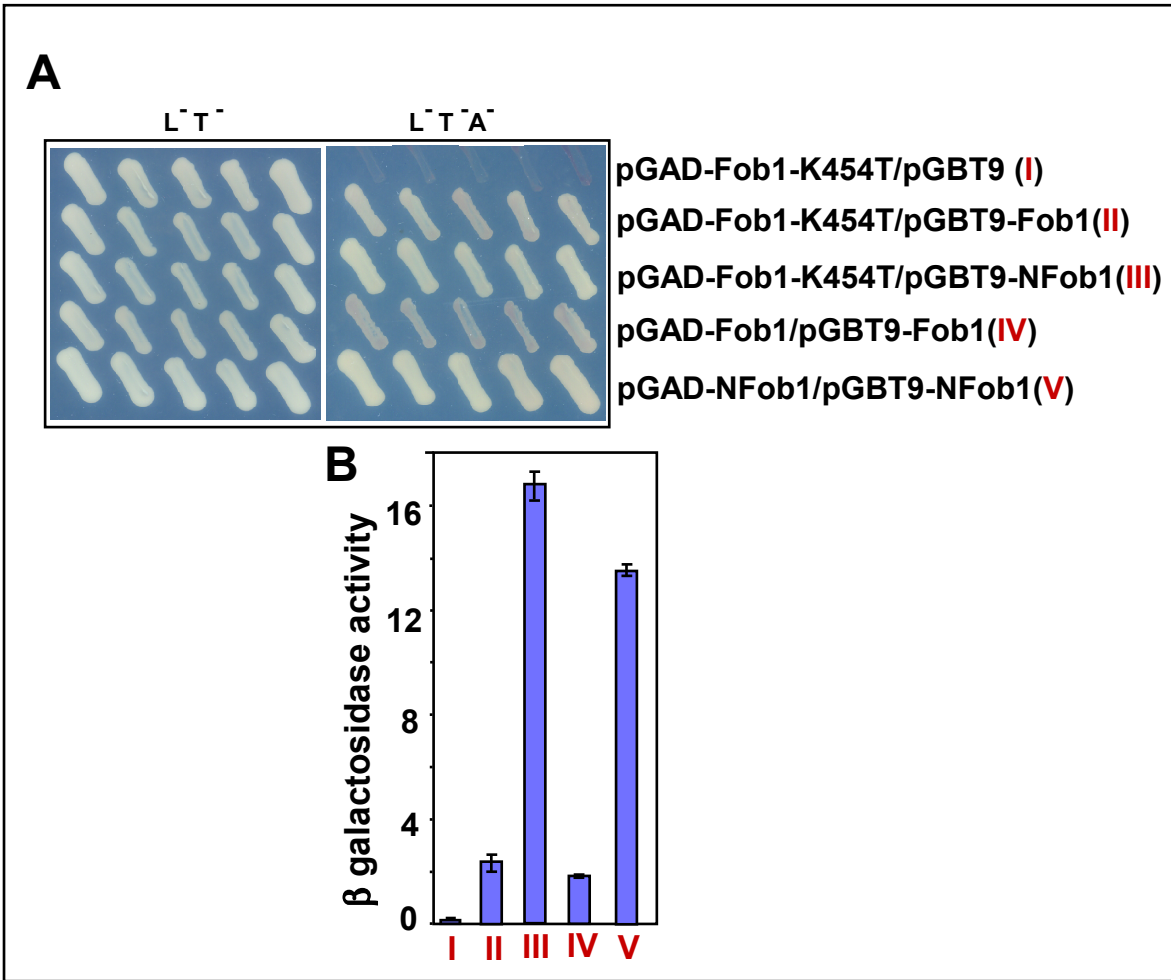

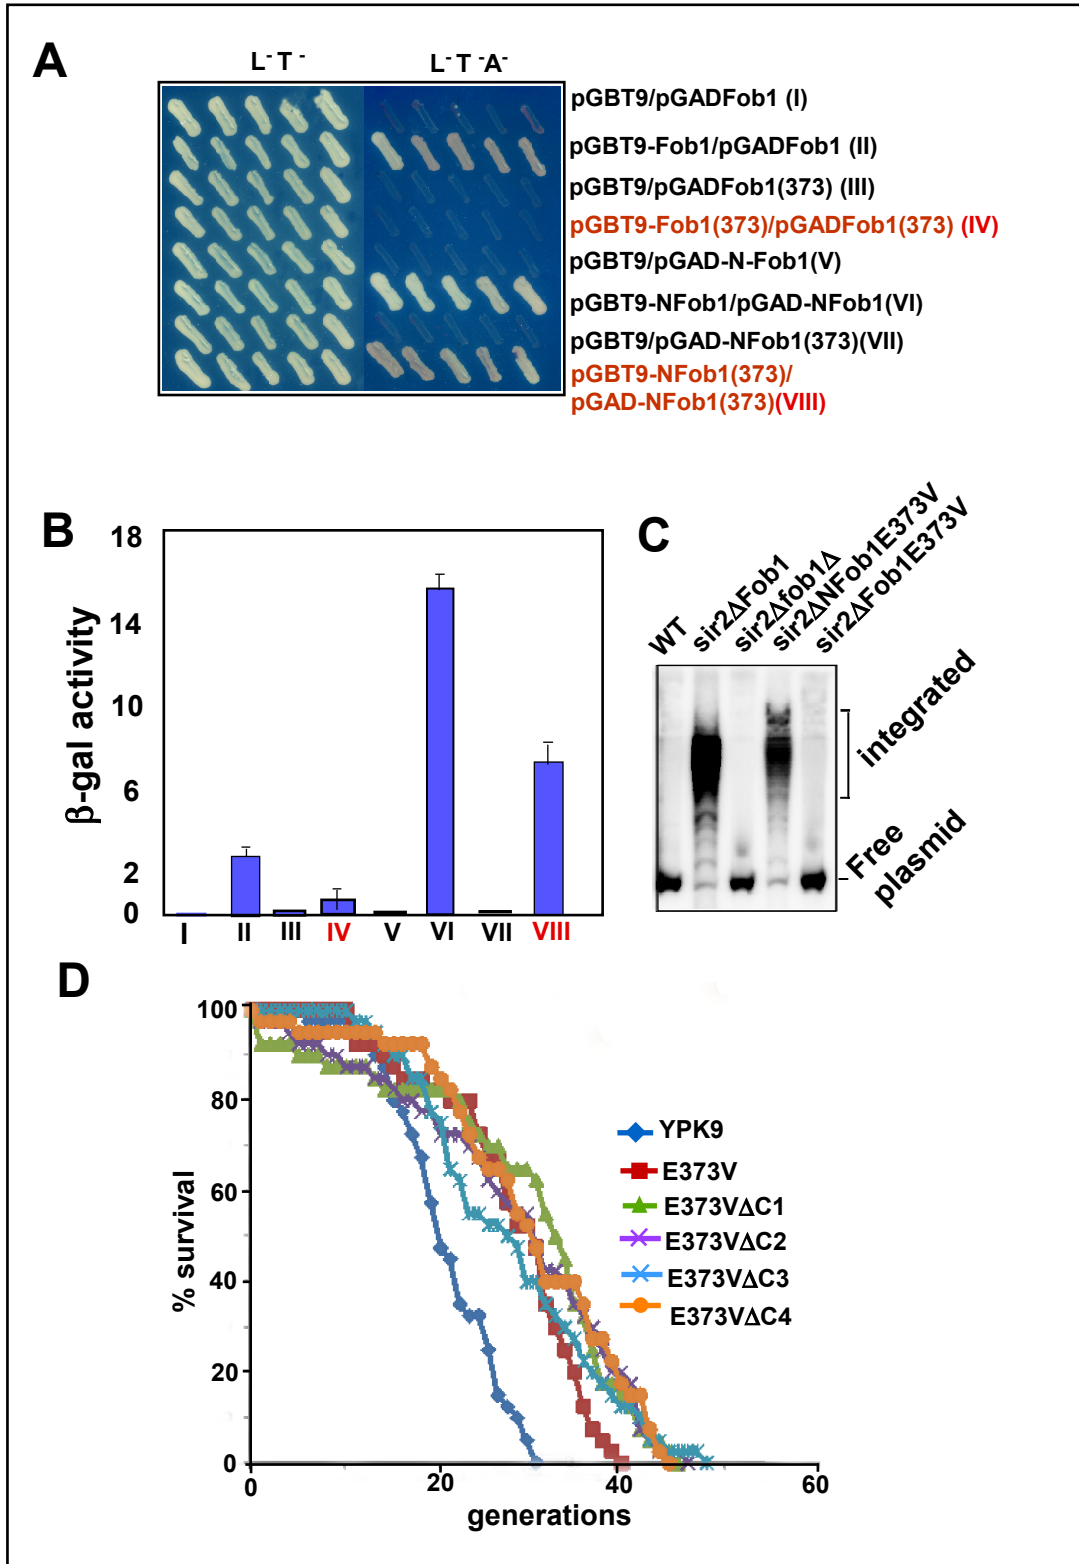

Supplement: supp_29.11.1188_Supplemental_Figure.pdf [file supp_29.11.1188_Supplemental_Figure.pdf]
